# Supplementary material for: Genomic convergence and network analysis approach to identify candidate genes in Alzheimer's disease
Source: PubMed Central journal article supplement (PMC4028079; doi:10.1186/1471-2164-15-199), 2014-03-15

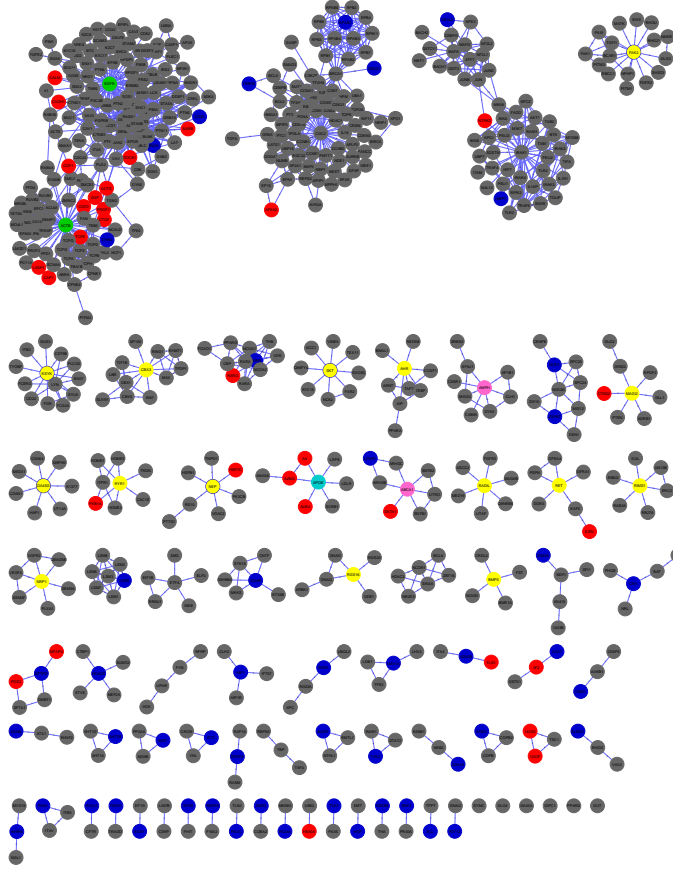

Supplement: 12864_2013_7037_MOESM5_ESM.pdf [file 12864_2013_7037_MOESM5_ESM.pdf]
